# Supplementary material
Source: Springer Nature journal article supplement (https://www.springermedizin.de/resource/supplementary/12885_2007_1273_MOESM4_ESM.pdf/9471608)

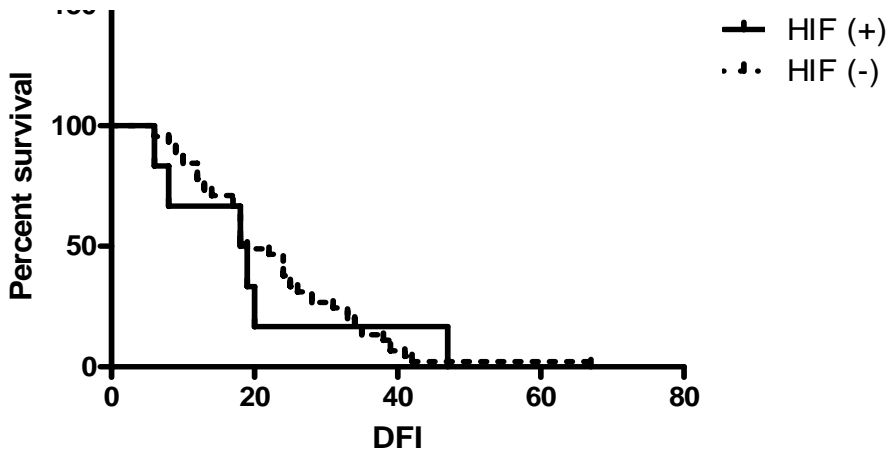

### Surv N Abcam: Survival proportions

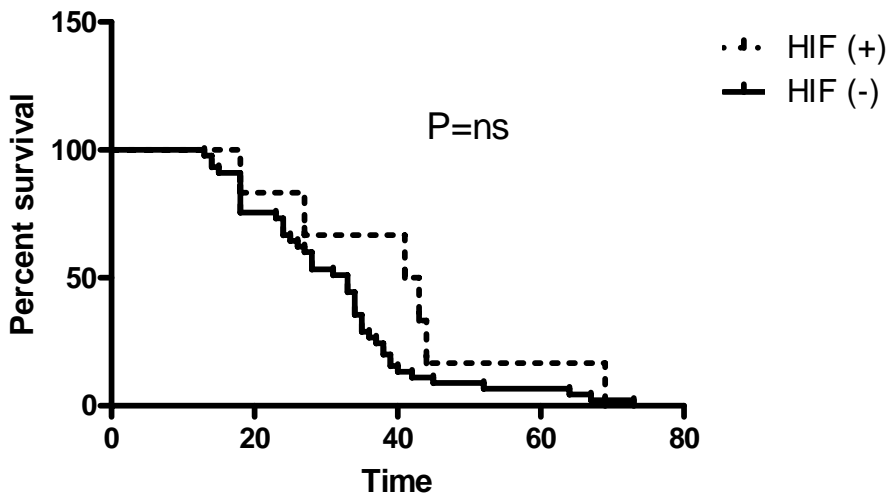

Supplement: MOESM4 [file 9471608]
